# Supplementary material for: The Impact of Frequent and Unrecognized Hypoglycemia on Mortality in the ACCORD Study
Source: PubMed Central journal article supplement — Diabetes Care. 2012 Jan 16;35(2):409–14. doi: 10.2337/dc11-0996 (PMC3263892; doi:10.2337/dc11-0996), 2012-01-16

SUPPLEMENTARY DATA

**Supplementary Table 1.** Hazard Ratios for Mortality by Baseline Covariates Within Glycemia Groups (Used for models containing updated, annualized number of hypoglycemic events)

| Predictor              | Intensive Glycemia (N=370 Deaths) |         |                 | Standard Glycemia (N=308 Deaths) |         |                 |
|------------------------|-----------------------------------|---------|-----------------|----------------------------------|---------|-----------------|
|                        | HR (95% CI)                       | P-value | Overall P-value | HR (95% CI)                      | P-value | Overall P-value |
| Age                    | 1.06 (1.04, 1.07)                 | <0.001  |                 | 1.07 (1.05,1.09)                 | <0.001  |                 |
| Race                   |                                   |         | 0.052           |                                  |         | 0.144           |
| AA                     | 1.55 (0.95, 2.55)                 | 0.081   |                 | 1.41 (0.82, 2.42)                | 0.218   |                 |
| Hispanic               | 0.97 (0.51, 1.87)                 | 0.934   |                 | 1.44 (0.75, 2.77)                | 0.276   |                 |
| NHW                    | 1.62 (1.03, 2.56)                 | 0.037   |                 | 1.70 (1.04, 2.77)                | 0.034   |                 |
| Other                  | Reference                         |         |                 | Reference                        |         |                 |
| Education              |                                   |         | 0.023           |                                  |         | 0.252           |
| College Grad or More   | 0.75 (0.55, 1.01)                 | 0.057   |                 | 0.84 (0.61, 1.15)                | 0.276   |                 |
| High School Grad       | 0.98 (0.75, 1.28)                 | 0.903   |                 | 1.10 (0.83, 1.47)                | 0.501   |                 |
| Less than HS           | 1.27 (0.94, 1.70)                 | 0.116   |                 | 1.19 (0.85, 1.67)                | 0.321   |                 |
| Some College           | Reference                         |         |                 | Reference                        |         |                 |
| Smoking                |                                   |         | <0.001          |                                  |         | <0.001          |
| Current                | 1.83 (1.33, 2.51)                 | <0.001  |                 | 2.21 (1.58, 3.09)                | <0.001  |                 |
| Former                 | 1.30 (1.02, 1.65)                 | 0.034   |                 | 1.31 (1.01, 1.71)                | 0.041   |                 |
| Never                  | Reference                         |         |                 | Reference                        |         |                 |
| Secondary Prevention   | 1.56 (1.26, 1.94)                 | <0.001  |                 | 1.28 (1.01, 1.62)                | 0.039   |                 |
| Baseline A1c           | 1.18 (1.08, 1.29)                 | <0.001  |                 | 1.04 (0.94, 1.17)                | 0.442   |                 |
| BMI                    | 1.03 (1.01, 1.05)                 | 0.010   |                 | 1.02 (0.99, 1.04)                | 0.150   |                 |
| Serum Creatinine       | 1.48 (0.97, 2.26)                 | 0.066   |                 | 1.39 (0.85, 2.28)                | 0.184   |                 |
| Urinary Alb/Cr mg/mg   |                                   |         | <0.001          |                                  |         | <0.001          |
| <30                    | 0.48 (0.34, 0.66)                 | <0.001  |                 | 0.46 (0.32, 0.65)                | <0.001  |                 |
| 30 to <=300            | 0.75 (0.54, 1.05)                 | 0.092   |                 | 0.61 (0.42, 0.88)                | 0.009   |                 |
| >300                   | Reference                         |         |                 | Reference                        |         |                 |
| Heart Failure/CHF      | 1.81 (1.30, 2.51)                 | <0.001  |                 | 2.15 (1.50, 3.07)                | <0.001  |                 |
| Amputation             | 1.70 (0.99, 2.91)                 | 0.055   |                 | 1.82 (1.03, 3.21)                | 0.038   |                 |
| Integrated Health Plan | 1.18 (0.96, 1.46)                 | 0.116   |                 | 1.14 (0.90, 1.44)                | 0.271   |                 |
| Lipid Trial            | 1.55 (1.14, 2.10)                 | 0.006   |                 | 0.98 (0.72, 1.35)                | 0.922   |                 |
| Intensive Lipid        | 0.86 (0.66, 1.11)                 | 0.245   |                 | 1.03 (0.76, 1.39)                | 0.834   |                 |
| Intensive BP           | 1.18 (0.85, 1.65)                 | 0.328   |                 | 0.91 (0.65, 1.28)                | 0.593   |                 |

SUPPLEMENTARY DATA

**Supplementary Table 2.** Hazard Ratios for Mortality by Baseline Covariates Within Glycemia Groups (Used for models containing updated, annualized number of 4 month intervals where participant was hypoglycemia unaware)

| Predictor                     | Intensive Glycemia (N=370 Deaths) |         |                 | Standard Glycemia (N=308 Deaths) |         |                 |
|-------------------------------|-----------------------------------|---------|-----------------|----------------------------------|---------|-----------------|
|                               | HR (95% CI)                       | P-value | Overall P-value | HR (95% CI)                      | P-value | Overall P-value |
| <b>Age</b>                    | 1.06 (1.05, 1.08)                 | <0.001  |                 | 1.06 (1.04, 1.08)                | <0.001  |                 |
| <b>Race</b>                   |                                   |         | 0.224           |                                  |         | 0.471           |
| <b>AA</b>                     | 1.58 (0.91, 2.74)                 | 0.104   |                 | 1.26 (0.72, 2.23)                | 0.418   |                 |
| <b>Hispanic</b>               | 1.16 (0.57, 2.35)                 | 0.683   |                 | 1.17 (0.58, 2.37)                | 0.656   |                 |
| <b>NHW</b>                    | 1.59 (0.96, 2.64)                 | 0.071   |                 | 1.44 (0.87, 2.40)                | 0.616   |                 |
| <b>Other</b>                  | Reference                         |         |                 | Reference                        |         |                 |
| <b>Education</b>              |                                   |         | 0.068           |                                  |         | 0.144           |
| <b>College Grad or More</b>   | 0.72 (0.52, 1.01)                 | 0.058   |                 | 0.74 (0.52, 1.06)                | 0.105   |                 |
| <b>High School Grad</b>       | 0.92 (0.68, 1.23)                 | 0.565   |                 | 1.02 (0.74, 1.40)                | 0.897   |                 |
| <b>Less than HS</b>           | 1.19 (0.86, 1.65)                 | 0.302   |                 | 1.20 (0.83, 1.75)                | 0.331   |                 |
| <b>Some College</b>           | Reference                         |         |                 | Reference                        |         |                 |
| <b>Smoking</b>                |                                   |         | 0.001           |                                  |         | 0.003           |
| <b>Current</b>                | 1.94 (1.36, 2.76)                 | <0.001  |                 | 1.90 (1.31, 2.80)                | 0.001   |                 |
| <b>Former</b>                 | 1.33 (1.02, 1.74)                 | 0.036   |                 | 1.31 (0.98, 1.74)                | 0.070   |                 |
| <b>Never</b>                  | Reference                         |         |                 | Reference                        |         |                 |
| <b>Secondary Prevention</b>   | 1.64 (1.29, 2.09)                 | <0.001  |                 | 1.29 (0.99, 1.68)                | 0.057   |                 |
| <b>Baseline A1c</b>           | 1.15 (1.07, 1.28)                 | 0.008   |                 | 1.07 (0.95, 1.21)                | 0.271   |                 |
| <b>BMI</b>                    | 1.03 (1.01, 1.05)                 | 0.008   |                 | 1.01 (0.99, 1.04)                | 0.328   |                 |
| <b>Serum Creatinine</b>       | 1.80 (1.13, 2.87)                 | 0.014   |                 | 1.54 (0.88, 2.68)                | 0.132   |                 |
| <b>Urinary Alb/Cr mg/mg</b>   |                                   |         | <0.001          |                                  |         | 0.010           |
| <b>&lt;30</b>                 | 0.49 (0.34, 0.70)                 | <0.001  |                 | 0.56 (0.37, 0.84)                | 0.006   |                 |
| <b>30 to &lt;=300</b>         | 0.71 (0.49, 1.04)                 | 0.078   |                 | 0.74 (0.48, 1.15)                | 0.179   |                 |
| <b>&gt;300</b>                | Reference                         |         |                 | Reference                        |         |                 |
| <b>Heart Failure/CHF</b>      | 1.84 (1.28, 2.65)                 | 0.001   |                 | 2.18 (1.47, 3.25)                | <0.001  |                 |
| <b>Amputation</b>             | 1.50 (0.80, 2.84)                 | 0.208   |                 | 1.94 (1.05, 3.59)                | 0.035   |                 |
| <b>Integrated Health Plan</b> | 1.09 (0.86, 1.38)                 | 0.480   |                 | 1.09 (0.84, 1.41)                | 0.517   |                 |
| <b>Lipid Trial</b>            | 1.40 (1.01, 1.95)                 | 0.045   |                 | 1.09 (0.77, 1.54)                | 0.632   |                 |
| <b>Intensive Lipid</b>        | 0.83 (0.62, 1.11)                 | 0.201   |                 | 0.90 (0.65, 1.25)                | 0.531   |                 |
| <b>Intensive BP</b>           | 1.00 (0.69, 1.44)                 | 0.980   |                 | 0.88 (0.60, 1.28)                | 0.496   |                 |

**Supplementary Figure 1. Number of Participants Used in Analyses**

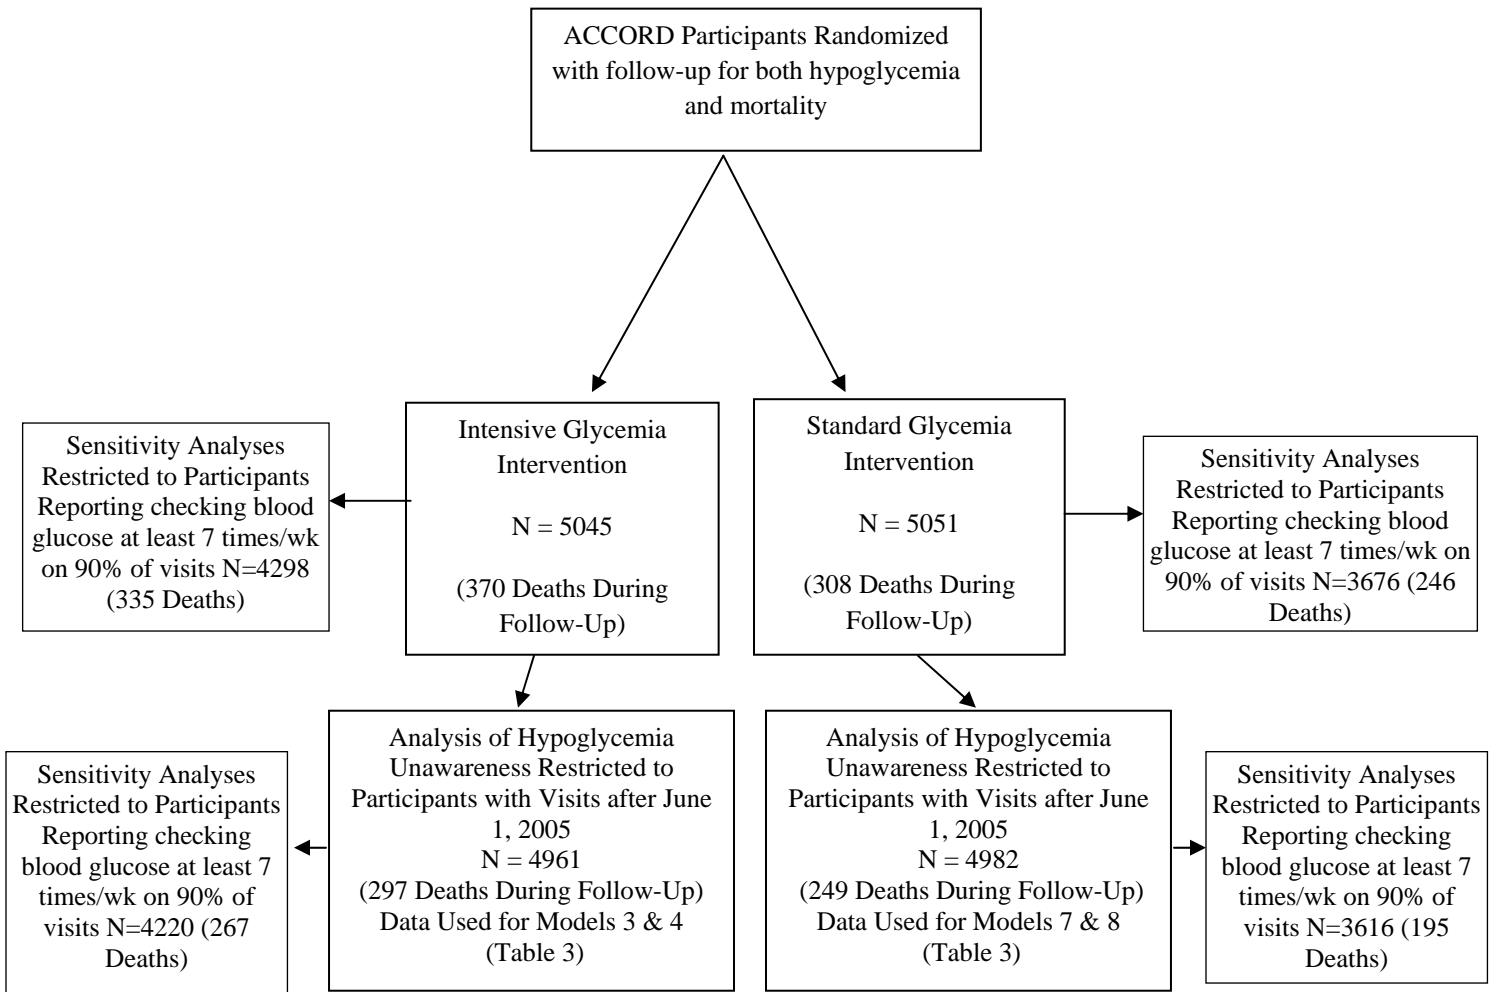

Supplement: supp_dc11-0996v110996_DC110996SupplementaryData.pdf [file supp_dc11-0996v110996_DC110996SupplementaryData.pdf]
